# Supplementary material
Source: publisher site journal article supplement (https://www.dovepress.com/get_supplementary_file.php?f=455490.docx)

**Supplemental file**


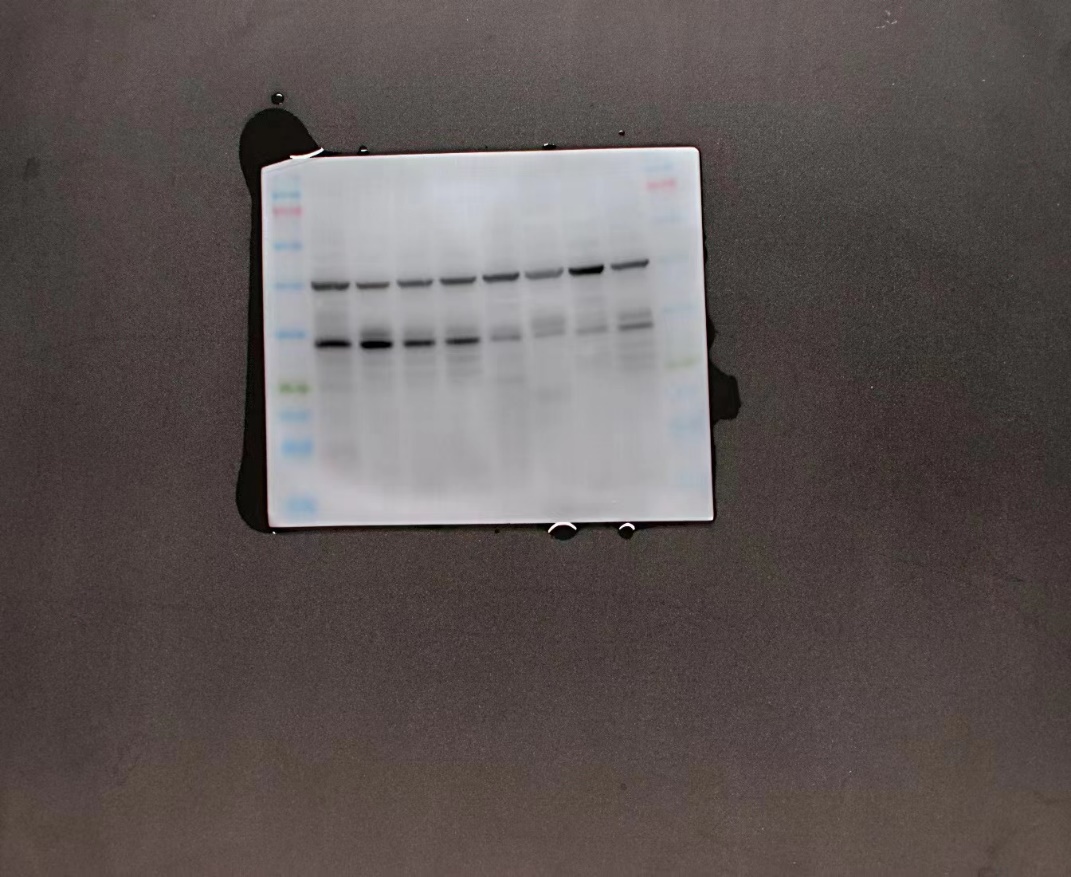


**Figure S1** The blot image of NAT1.

Supplement: Supplementary file 1 [file get_supplementary_file.php]
